# Supplementary material
Source: PubMed Central journal article supplement (PMC3932526)
Supplement: NIHMS498797-supplement-01.pdf [file NIHMS498797-supplement-01.pdf]

**Table 1: Primer Information**

| <b>Primer Name</b> | <b>Primer Target</b>                     | <b>Primer Sequence</b>                | <b>Annealing temp (° C)</b> |
|--------------------|------------------------------------------|---------------------------------------|-----------------------------|
| tPax5.E1.S         | tPax5, exon 1                            | 5'-ATG GAA GTA GAG GCC GAG GG-3'      | 55                          |
| tPax5.E4.AS        | tPax5, exon 4                            | 5'-GAA GCT GGG ACC GGC TGA TTG-3'     | 55                          |
| tPax5.485.S        | tPax5,exon 5                             | 5'-GGT AGC GTC GAC ACA GGT TT-3'      | 60                          |
| tPax5.680.AS       | tPax5 exon 6                             | 5'-AGG TCC CCT CTC ATC TGC TT-3'      | 60                          |
| tPax5.E2.S         | tPax5, exon 2                            | 5'-CAC GGA TGT GTC AGC AAG AT-3'      | 56                          |
| tPax5/E1-3.S       | tPax5 $\Delta$ 2, flanking exons 1 and 3 | 5'-CGG GAC GAG CAG GTA CTA TG-3'      | 56                          |
| tPax5/E3-4.AS      | tPax5, flanking exons 3 and 4            | 5'-CCT GAT GAT CCT GTT GAT AGA-3'     | 56                          |
| tPax5/3'end.AS     | tPax5 3'end                              | 5'-TCA GTG GCG GTC GTA GGC GG-3'      | 55                          |
| tPax5.764.S        | tPax5, exon 7                            | 5'-ACC AAT CTG GCC AAT CCA GGG TCA-3' | 55                          |
| tPax5.1104.AS      | tPax5 on exon 10                         | 5'-CAT CTG TCC CGT CTG GCT GG-3'      | 55                          |
| Ttub56.F           | $\alpha$ -Tubulin                        | 5'-TTC ACC TCC CTG CTG ATG-3'         | 56                          |
| Ttub56.R           | $\alpha$ -Tubulin                        | 5'-CCA CCA TGA AGG CAC AGT-3'         | 56                          |
