# Supplementary material
Source: PubMed Central journal article supplement (PMC3932526)

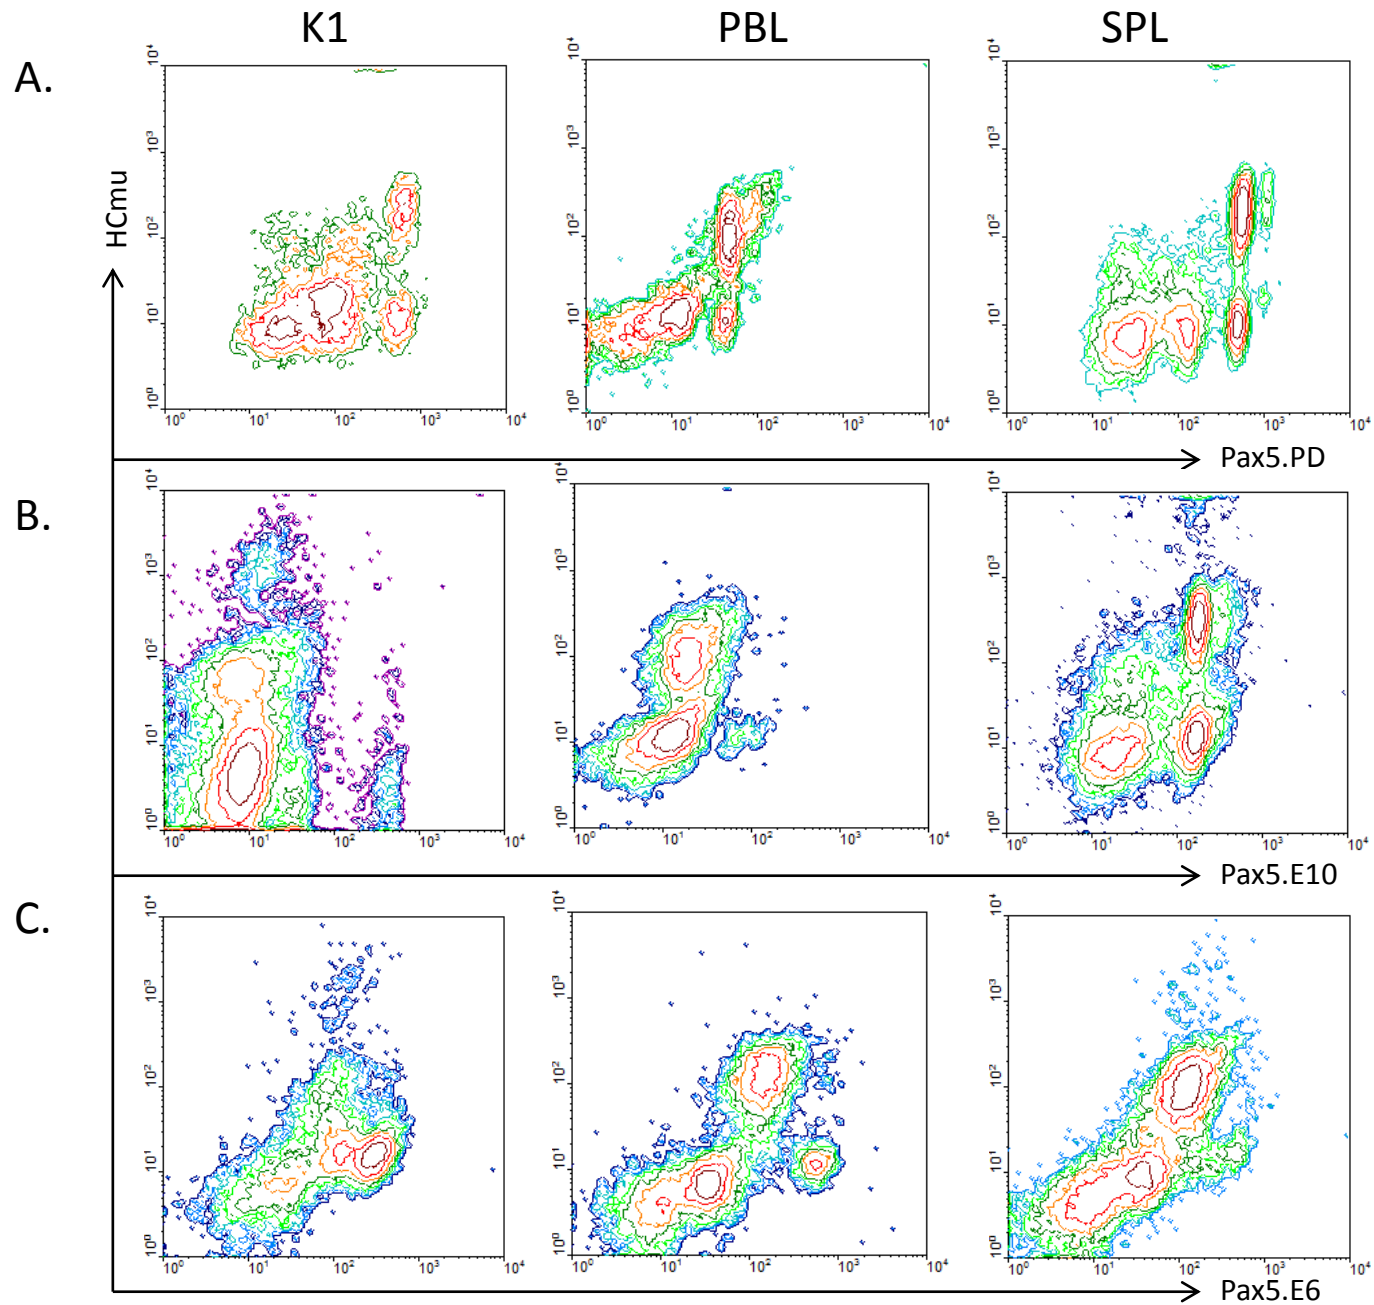

Supplemental Figure 1.

Supplement: NIHMS498797-supplement-02.pdf [file NIHMS498797-supplement-02.pdf]
